# Supplementary material for: Towards molecular batteries: coverage of small aminosilica nanoparticles with ferrocenyl and pentamethylferrocenyl groups and their redox properties
Source: Royal Society of Chemistry journal article supplement (doi:10.1039/b9nj00481e), 2009-01-01
Supplement: b9nj00481e.pdf [file b9nj00481e.pdf]

## Supplementary information

### Towards molecular batteries: coverage of small amino-silica nanoparticles with ferrocenyl and pentamethylferrocenyl groups and their redox properties.

Tetsuro Kusamoto, Jaime Ruiz and Didier Astruc

- **General data**
- **Determination of the number of Fc and Fc\* groups per SiO<sub>2</sub> NP**
- **Figure SI-1.** Cyclic voltammogram of Fc\* SiO<sub>2</sub> NPs in the presence of decamethylferrocene
- **Figure SI-2.** Infrared spectrum of Fc SiO<sub>2</sub> NPs
- **Figure SI-3.** Infrared spectrum of Fc\* SiO<sub>2</sub> NPs

#### General data

For general data, see ref. 7a-c. The CVs were recorded at 25°C on a PAR 273 potentiostat galvanostat with Pt working and counter electrodes and Ag reference electrode. The E<sub>1/2</sub> values were measured using decamethylferrocene as internal reference (see Figure SI-1). Infrared spectra were recorded on a FT-IR Paragon 1000 Perkin-Elmer spectrometer using neat samples in KBR disks.

#### Determination of the number of Fc groups per SiO<sub>2</sub> NP

Volume of a 12-nm SiO<sub>2</sub> NP core:  $\frac{4}{3} \pi r^3 = 1.33 \times 3.14 \times (6 \cdot 10^{-7} \text{ cm})^3 = 0.756 \cdot 10^{-18} \text{ cm}^3$

Core mass =  $0.756 \cdot 10^{-18} \times 2.2 = 1.66 \cdot 10^{-18} \text{ g}$

Additional mass of the 300 FcCONHC<sub>3</sub>H<sub>6</sub>SiO<sub>2</sub> chains:  $0.2 \cdot 10^{-18} \text{ g}$

Total mass:  $1.86 \cdot 10^{-18} \text{ g}$

Titration of a sample of 0.328 g of Fc SiO<sub>2</sub> NPs by 1.3 mL of FcCOMe<sup>+</sup> (74 mM)

Number of Fc SiO<sub>2</sub> NPs in the sample:  $0.328 / 1.86 \cdot 10^{-18} = 1.77 \cdot 10^{17}$

Number of moles of electrons exchanged at the equivalent point:  $1.3 \cdot 10^{-3} \text{ L} \times 74 \cdot 10^{-3} \text{ mol/L} = 0.962 \cdot 10^{-4} \text{ mol}$

Number of electrons exchanged at the equivalent point =  $0.962 \cdot 10^{-4} \text{ mol} \times 6.023 \cdot 10^{23} = 5.96 \cdot 10^{19}$  electrons (one electron *per* Fc group)

Number of electrons exchanged *per* Fc SiO<sub>2</sub> NP =  $5.96 \cdot 10^{19} / 1.77 \cdot 10^{17} = 335$

Estimated error (end point) approx. 15%: **335 ± 50**

#### Determination of the number of Fc\* groups per SiO<sub>2</sub> NP

Titration of a sample of 0.086 g of Fc\* SiO<sub>2</sub> NPs by 1.0 mL of oxidant (18.7 mM)

Number of Fc SiO<sub>2</sub> NPs in the sample:  $0.086 / 1.86 \cdot 10^{-18} = 0.47 \cdot 10^{17}$

Number of moles of electrons exchanged at the equivalent point:  $1 \cdot 10^{-3} \text{ L} \times 18.7 \cdot 10^{-3} \text{ mol/L} = 1.87 \cdot 10^{-5} \text{ mol}$

Number of electrons exchanged at the equivalent point =  $1.87 \cdot 10^{-5} \text{ mol} \times 6.023 \cdot 10^{23} = 1.12 \cdot 10^{19}$  electrons (one electron *per* Fc group)

Number of electrons exchanged *per* Fc SiO<sub>2</sub> NP =  $1.12 \cdot 10^{19} / 0.47 \cdot 10^{17} = 240$

Estimated erreur (end point) approx. 15%: **240 ± 40**

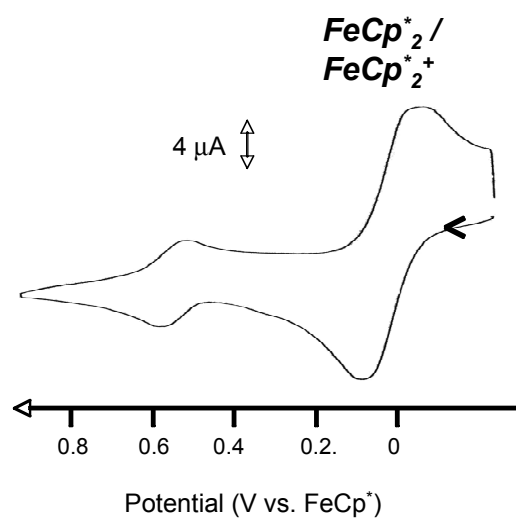

Figure 1. CV of  $\text{Me}_3\text{Fc-SiO}_2$  NPs. Conditions are as follows: methanol 2 ml +  $\text{CH}_3\text{CN}$  2 ml, working electrode: ITO, counter: Pt, Reference: Ag, 35 mg of the sample, 10 mM  $n\text{-Bu}_4\text{N}^+\text{PF}_6^-$ , 200 mV/s.

**Figure SI-1.** Cyclic voltammogram of  $\text{Fc}^* \text{SiO}_2$  NPs in the presence of decamethylferrocene (PAR 273 potentiostat galvanostat)
